# Supplementary material
Source: bioRxiv or medRxiv preprint supplement (https://www.biorxiv.org/highwire/filestream/23330/field_highwire_adjunct_files/4/083931-13.pdf)

Figure S13.1

Both species

Split reads only

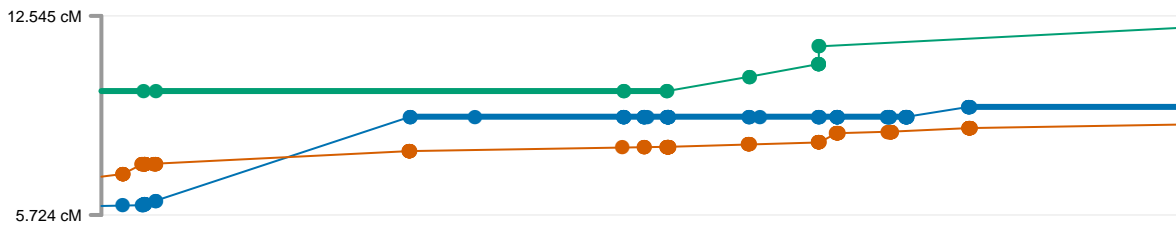

PBHoney Candidates  
Trio Inverted  
Trio Spanning  
Trio Edges

*H. cydno*  
females males  
*H. melpomene*  
females males

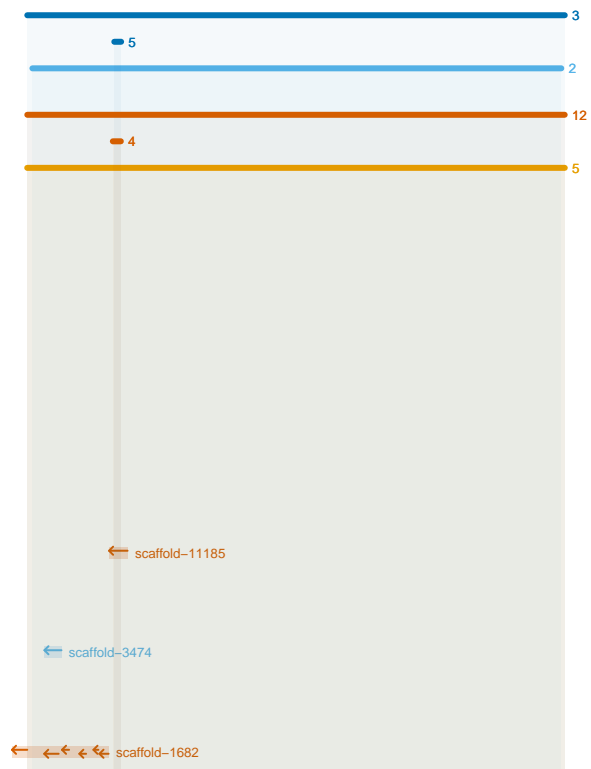

Genome

CDS  
exon  
mRNA  
tRNA  
rRNA  
gene

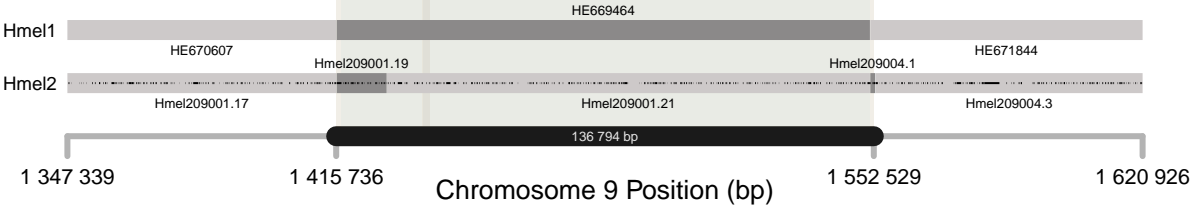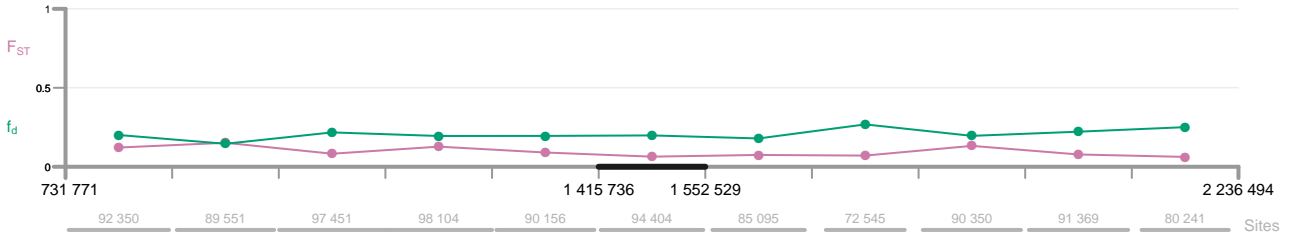

Figure S13.2

Both species

Split reads only

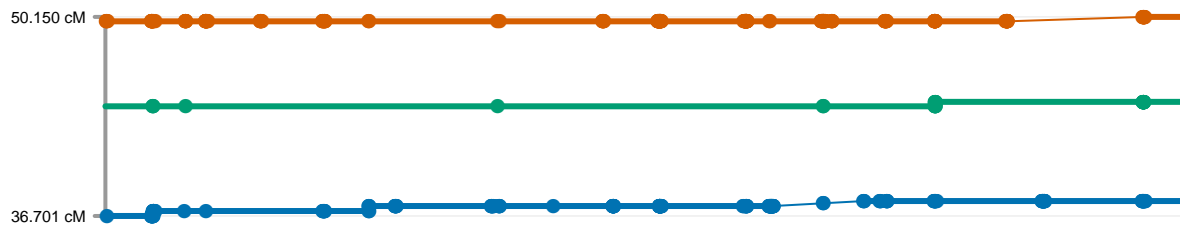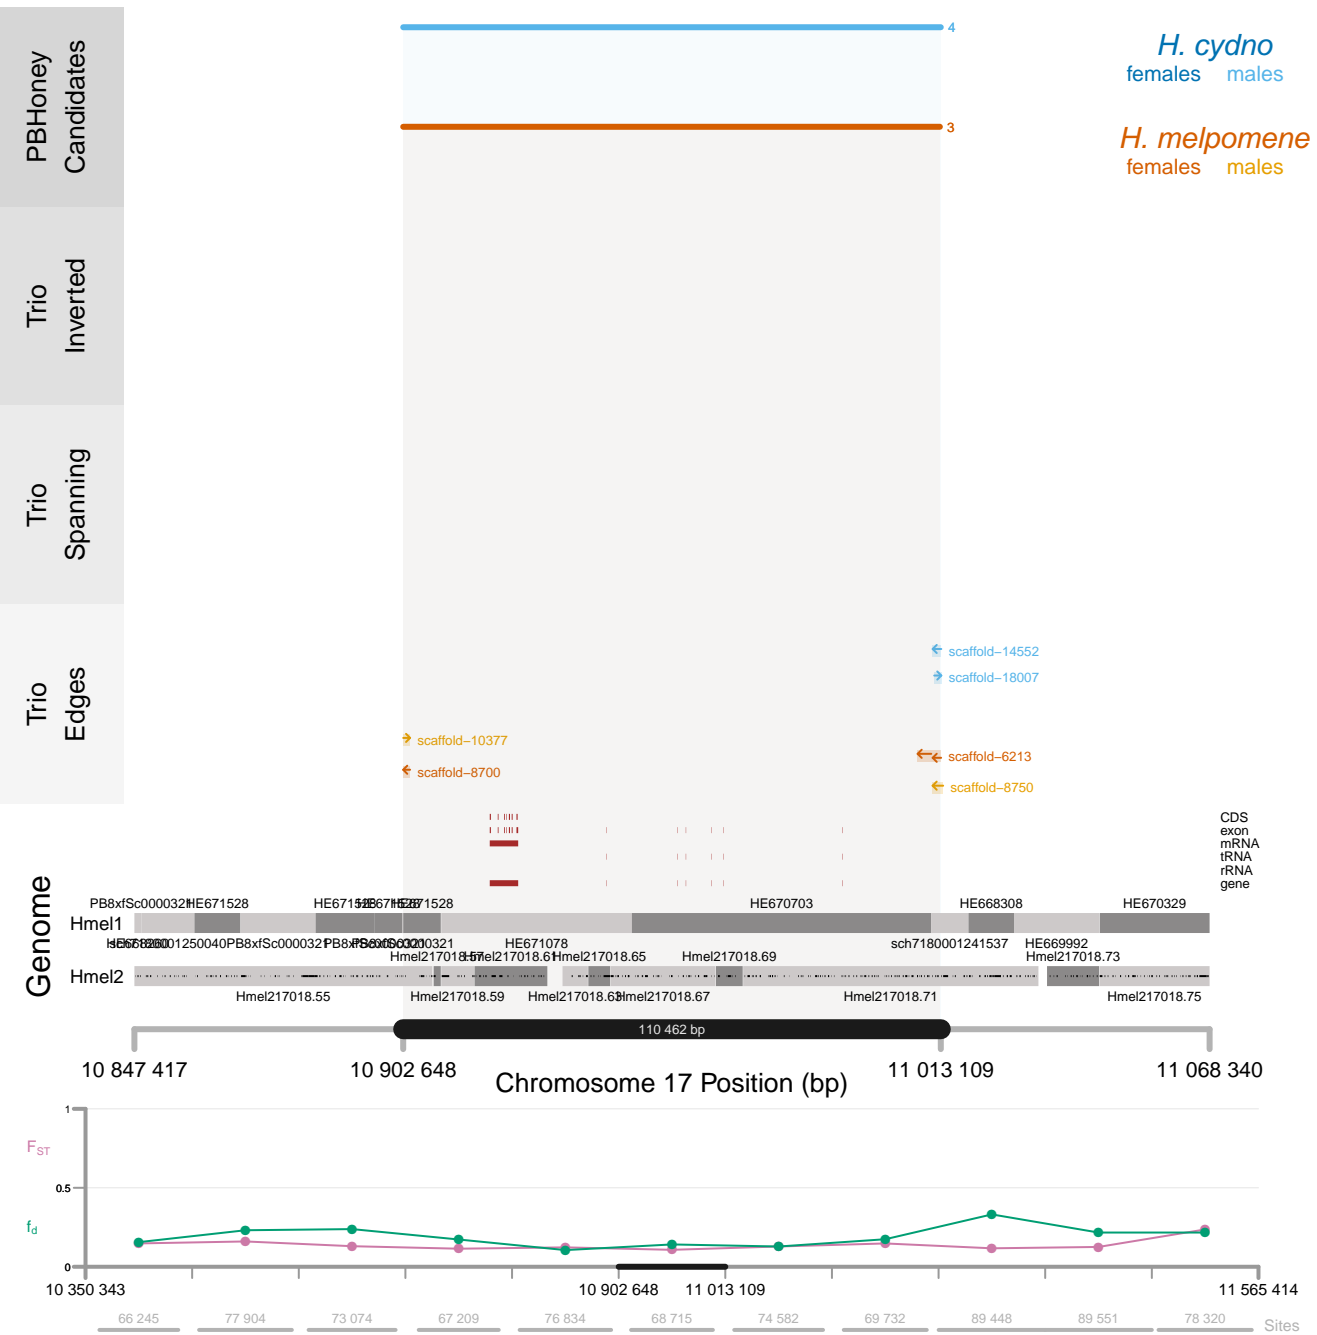

Figure S13.3

Both species

Split reads only

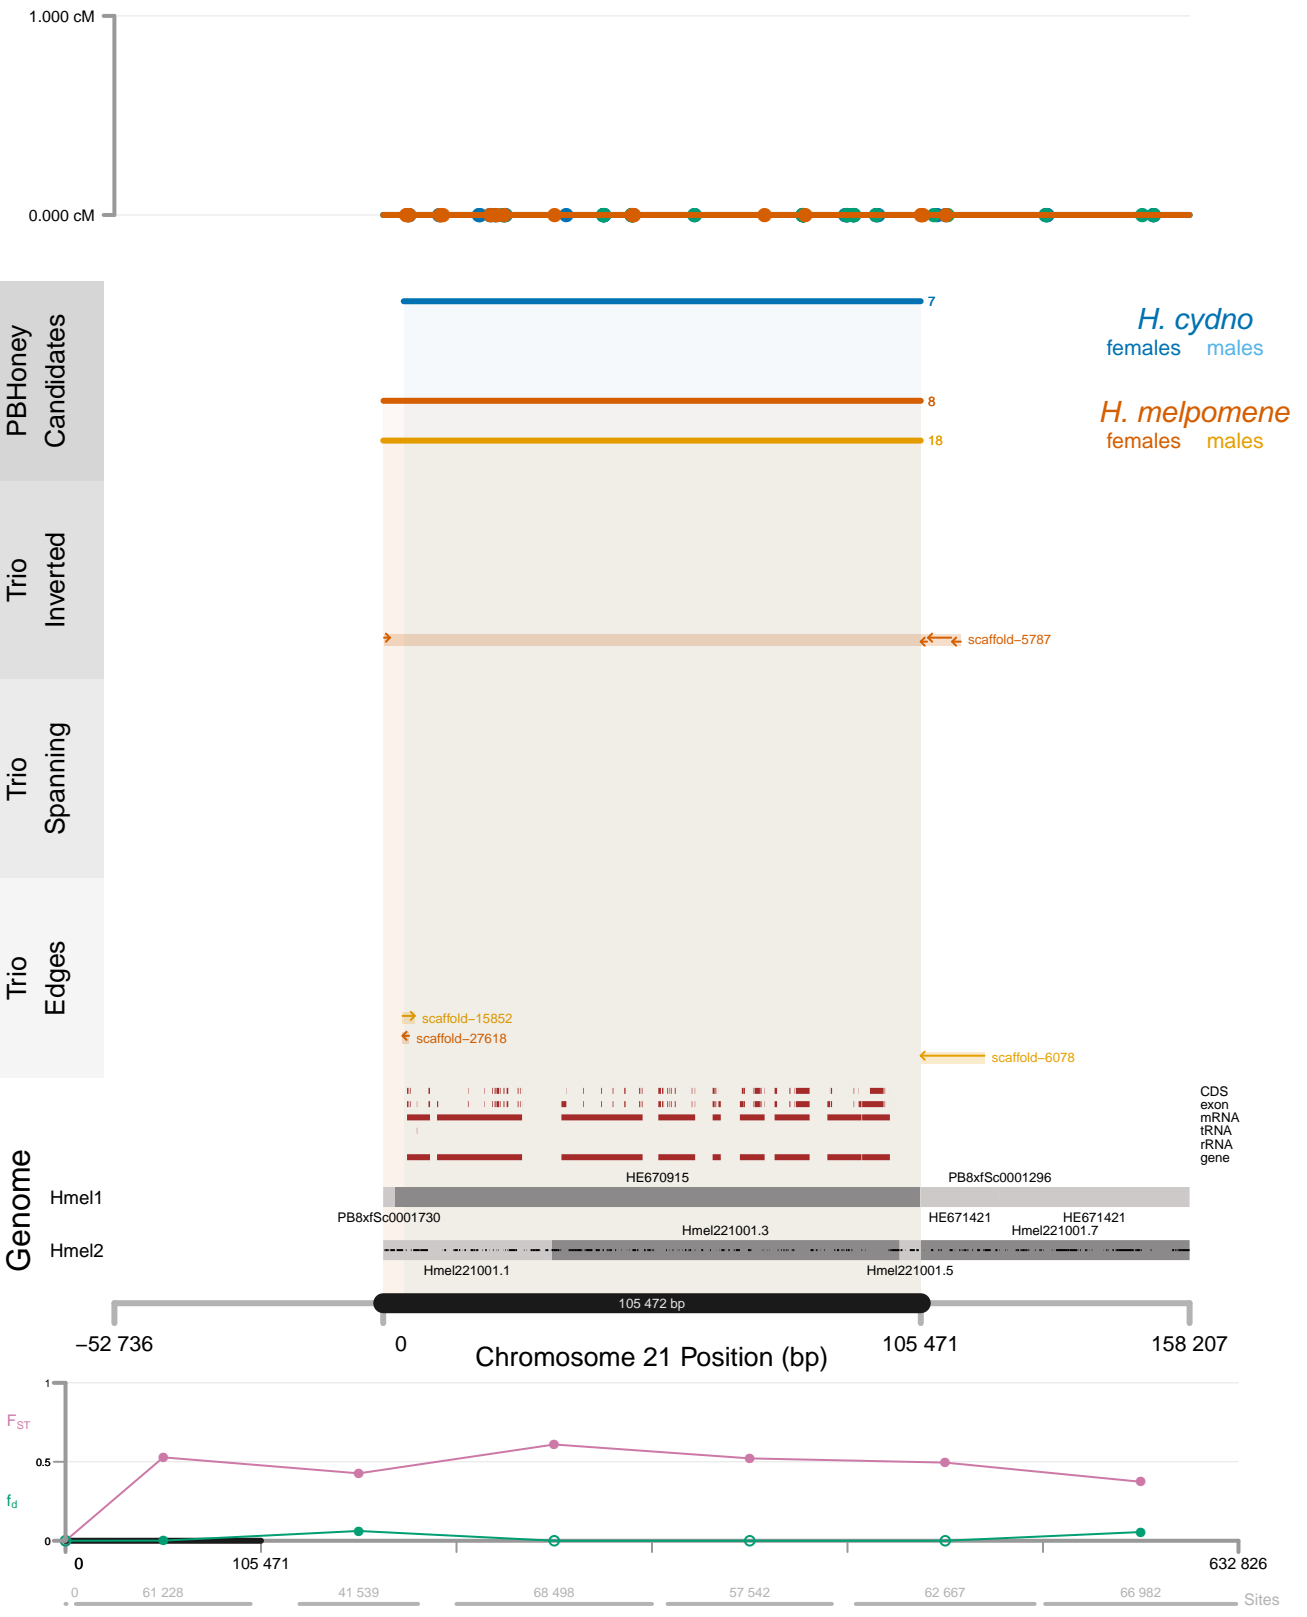

Figure S13.4

Both species

Split reads only

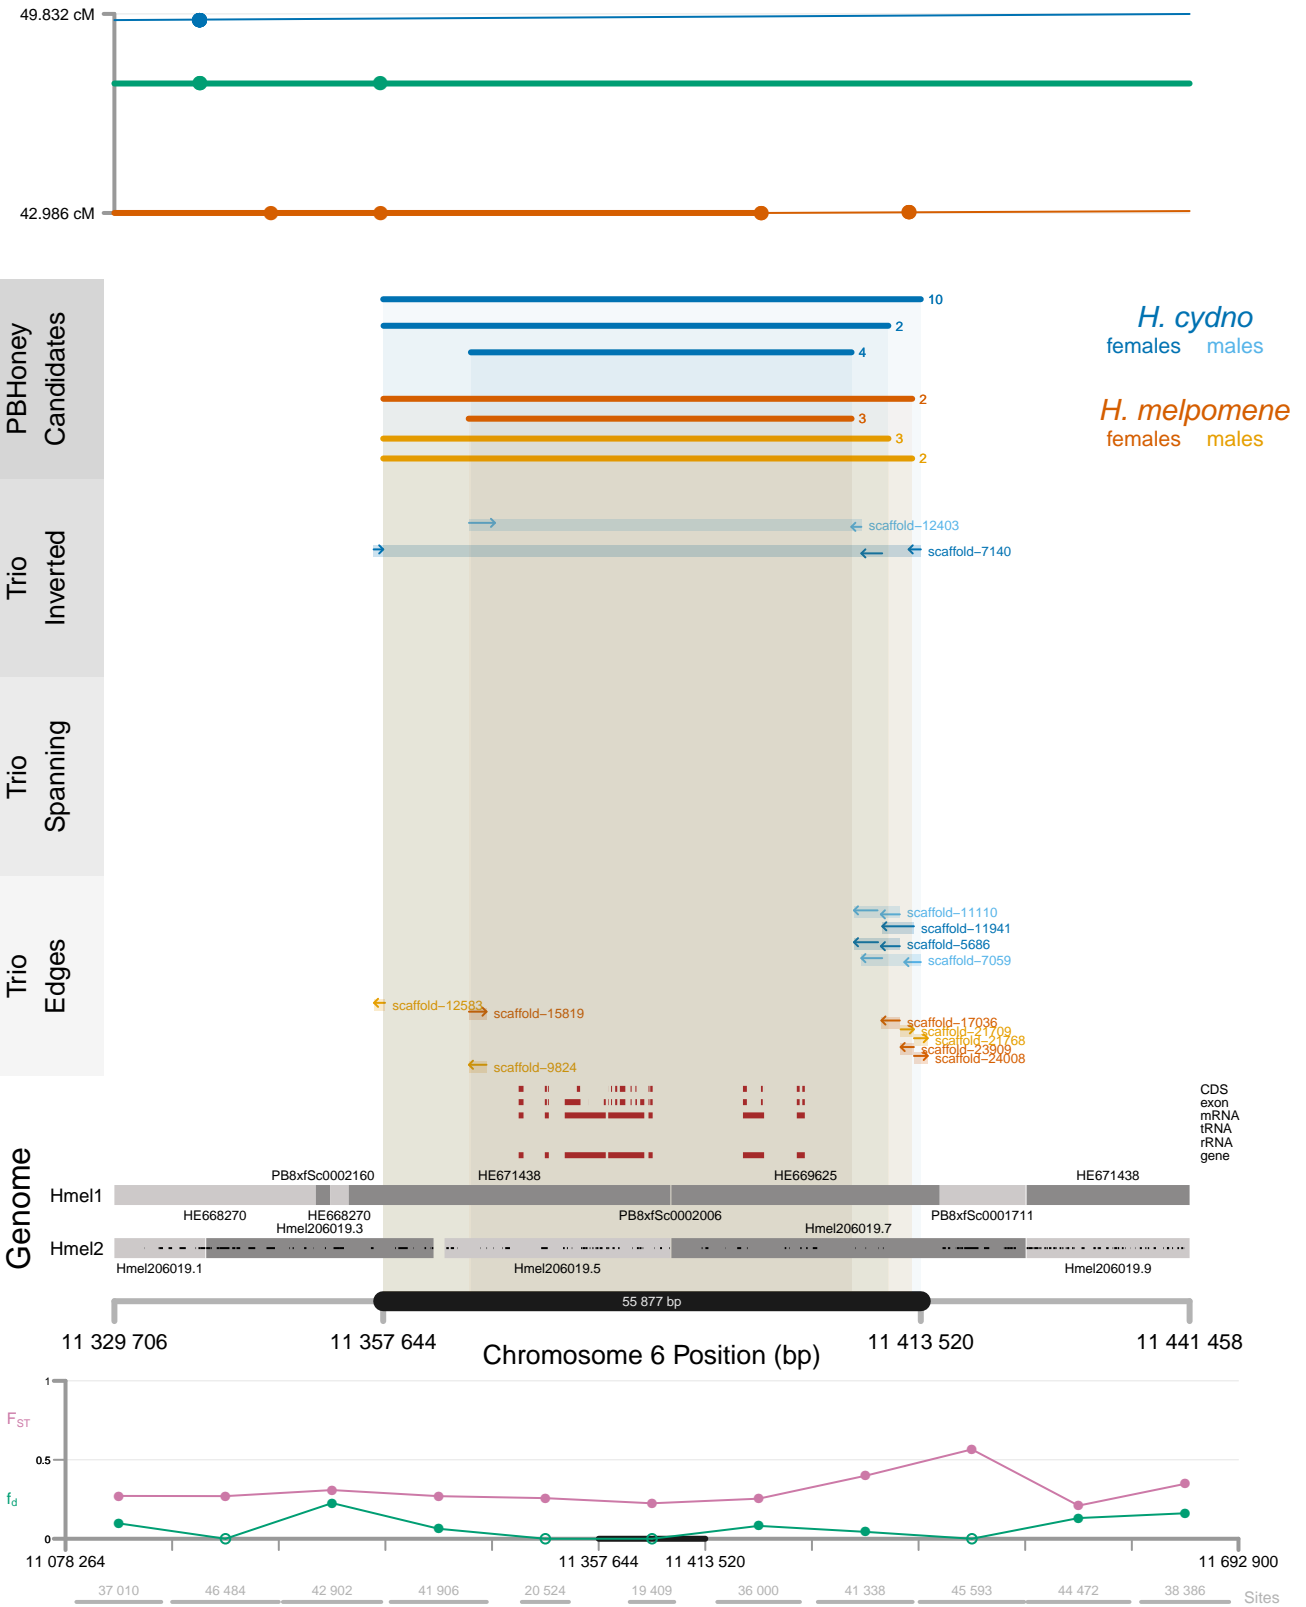

Figure S13.5

Both species

Split reads only

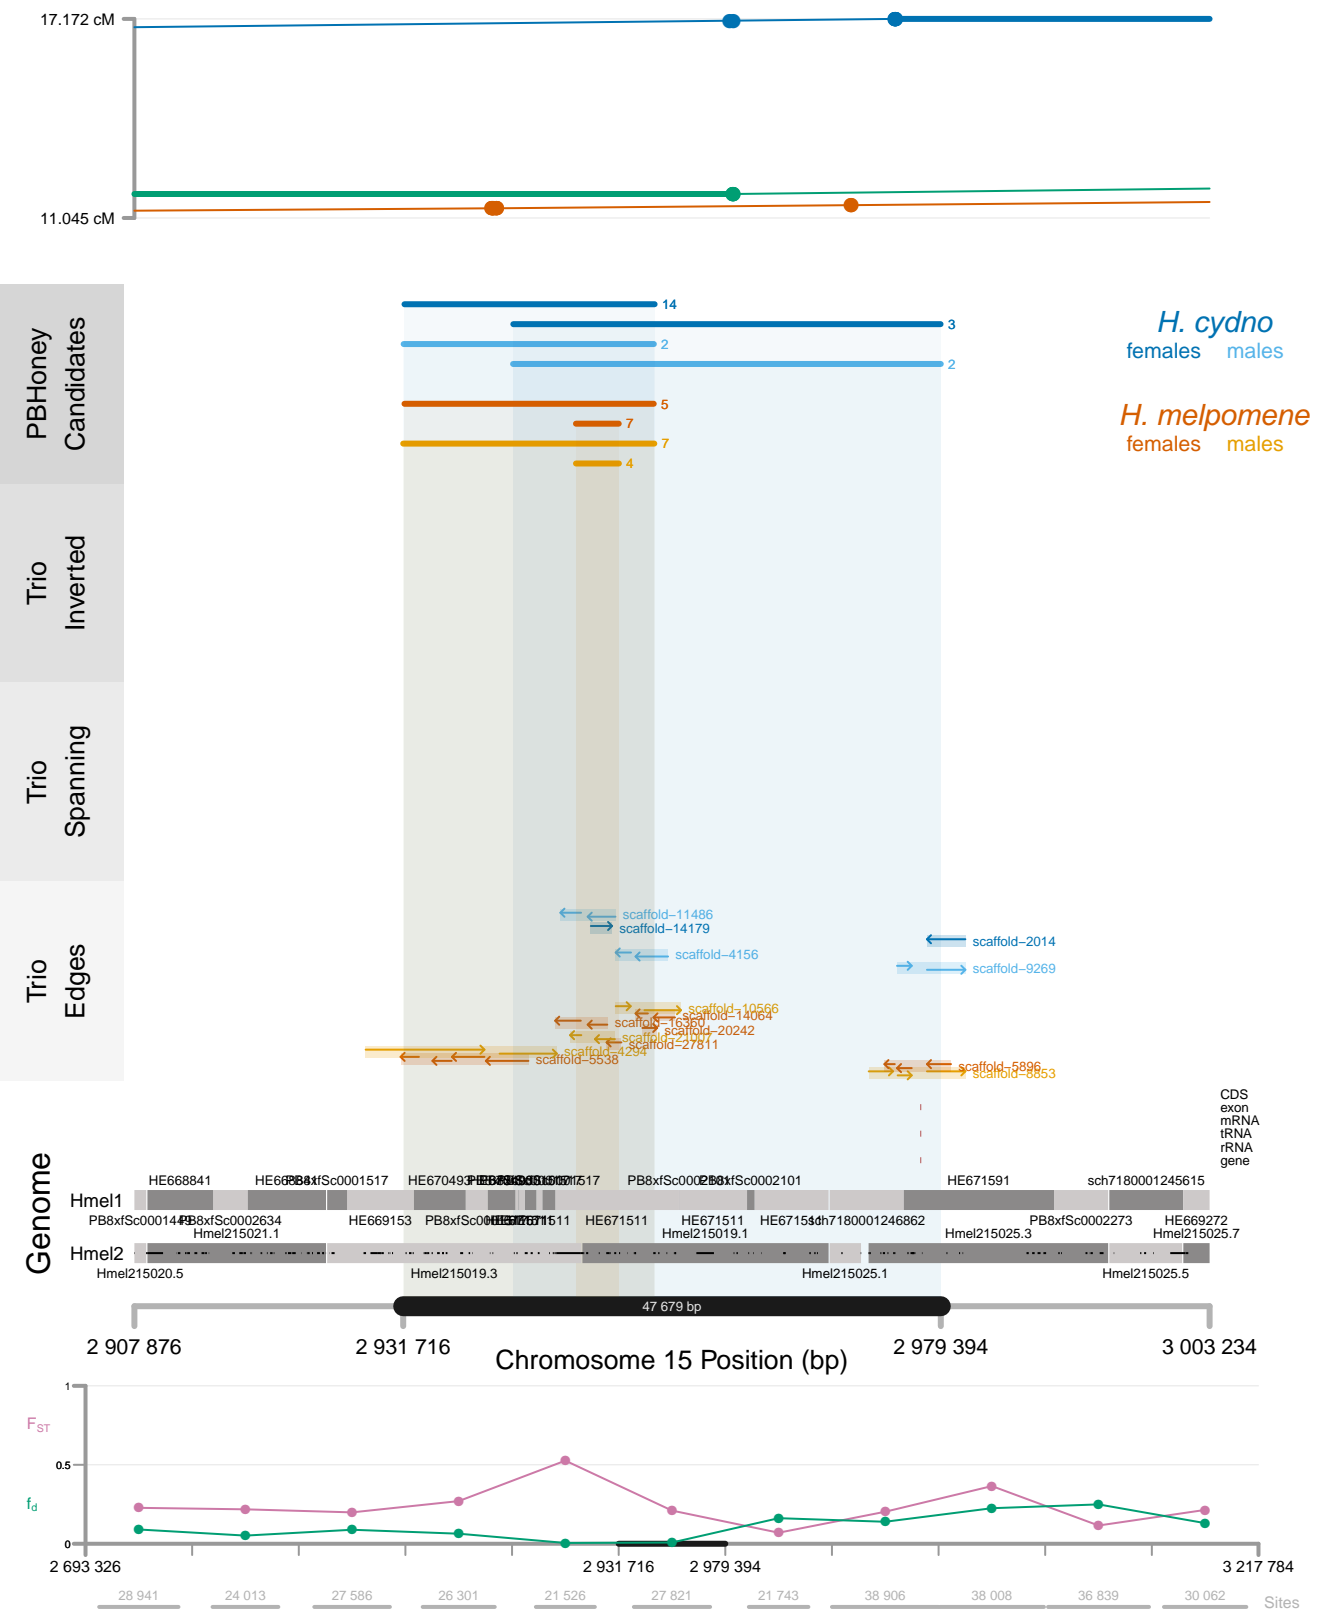

Figure S13.6

Both species

Split reads only

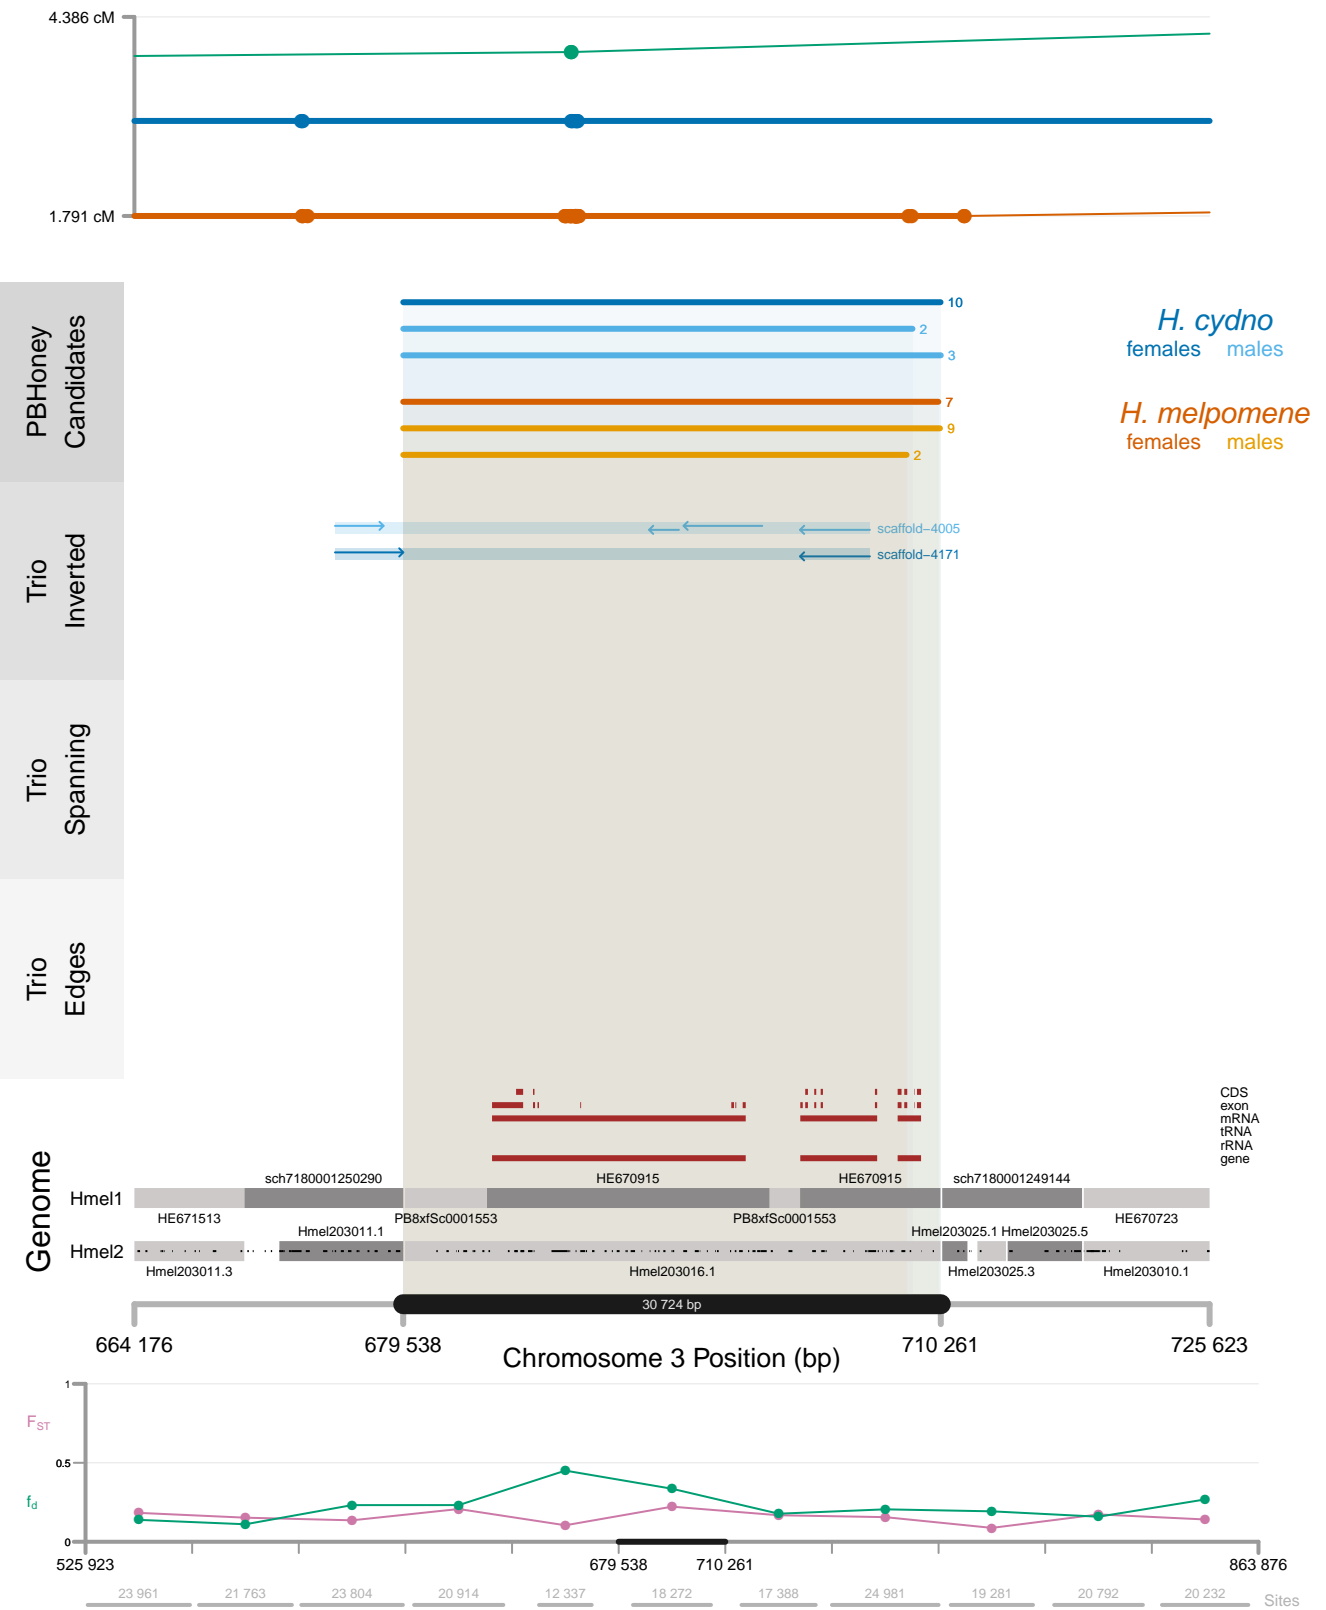

Figure S13.7

Both species

Split reads only

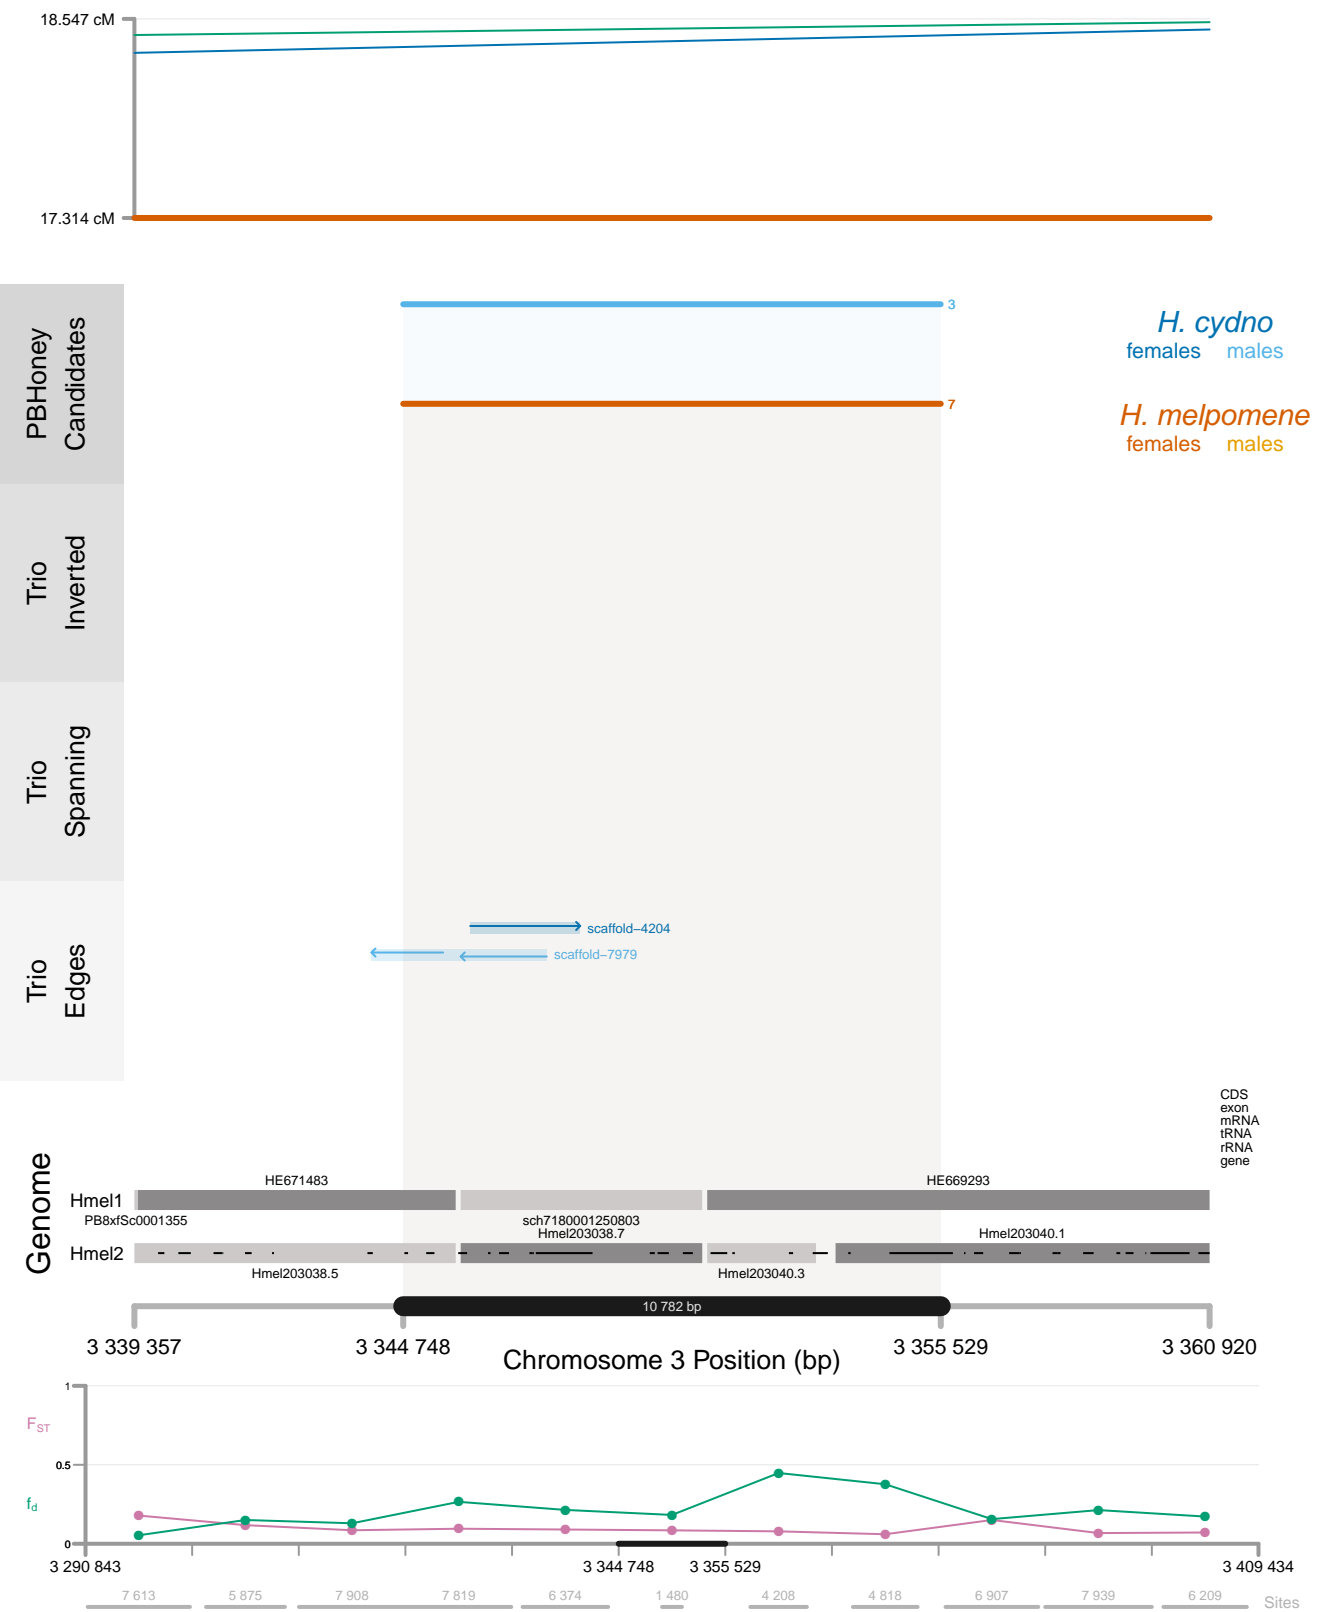

Figure S13.8

Both species

Split reads only

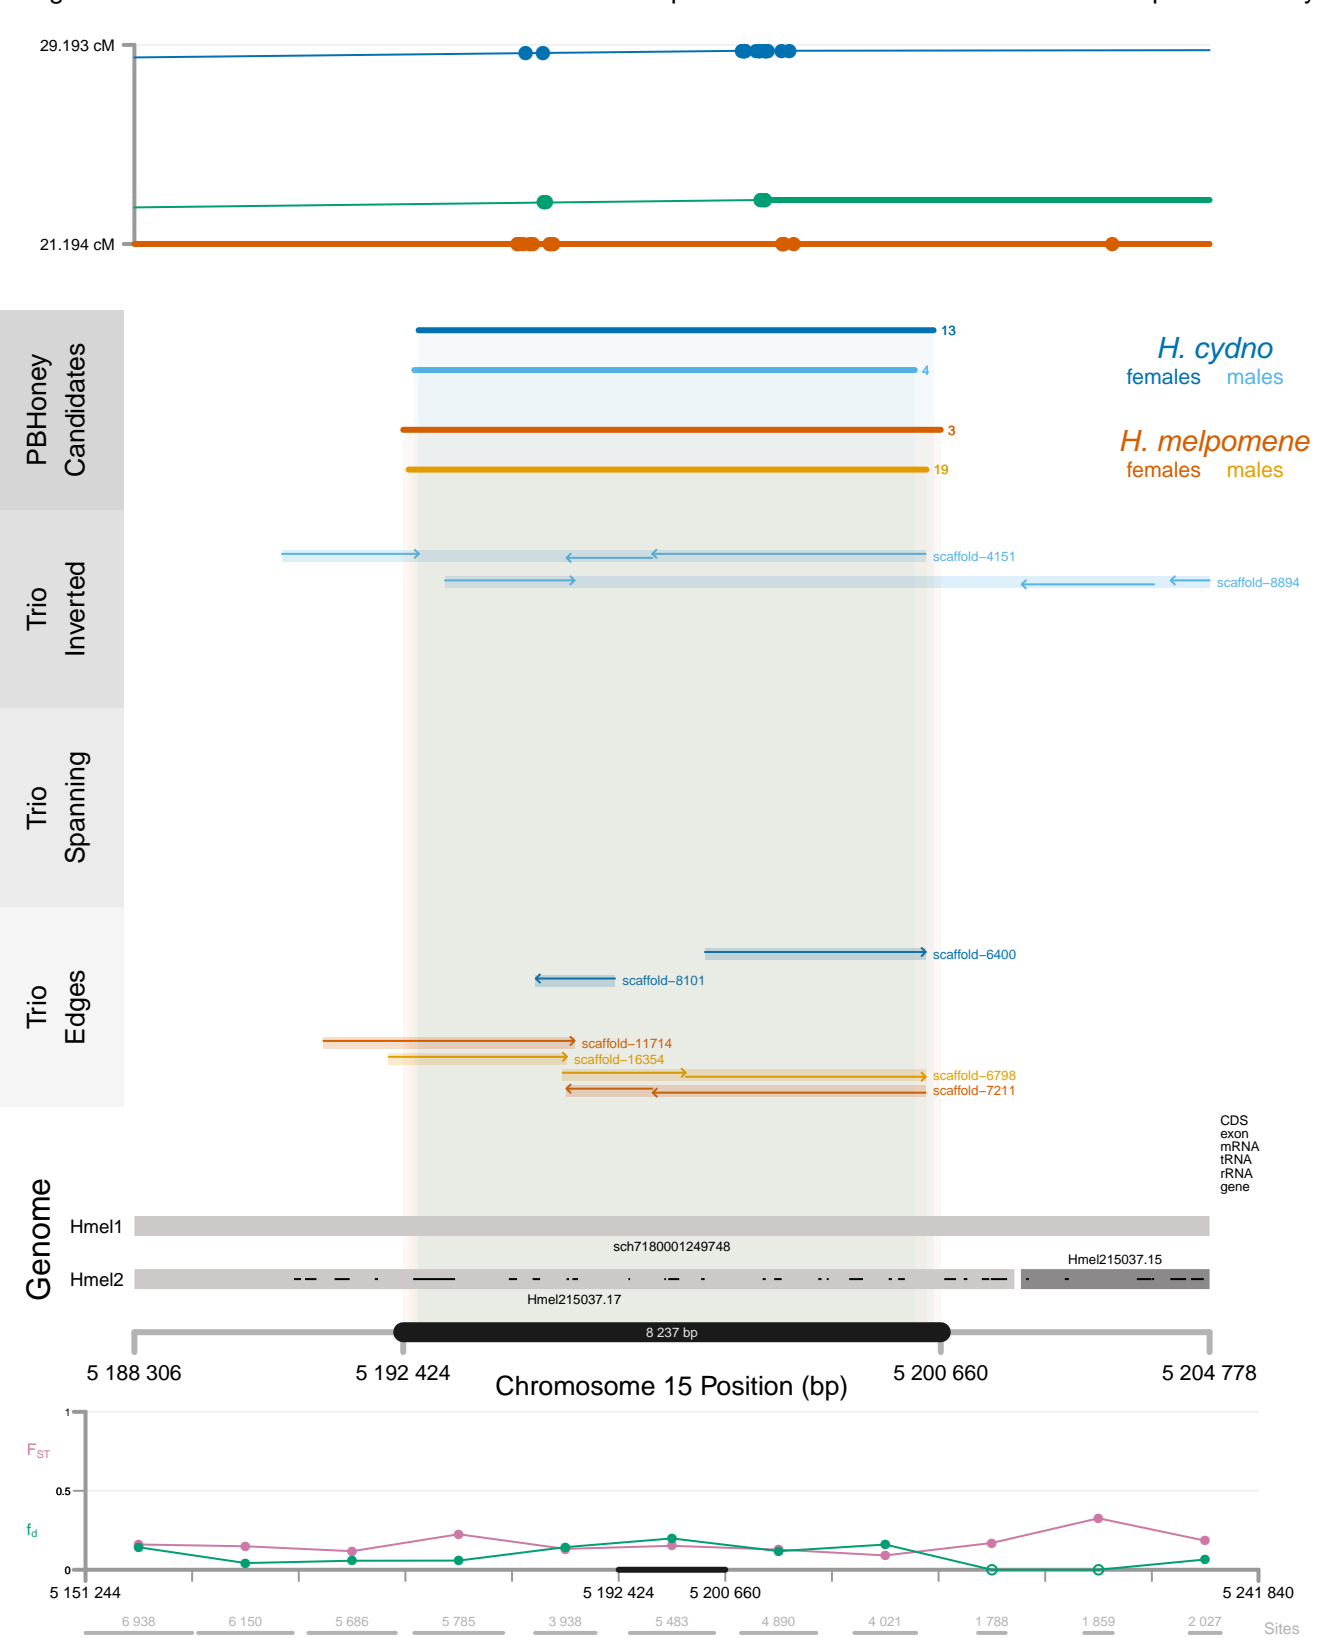



Figure S13.9

Both species

Split reads only

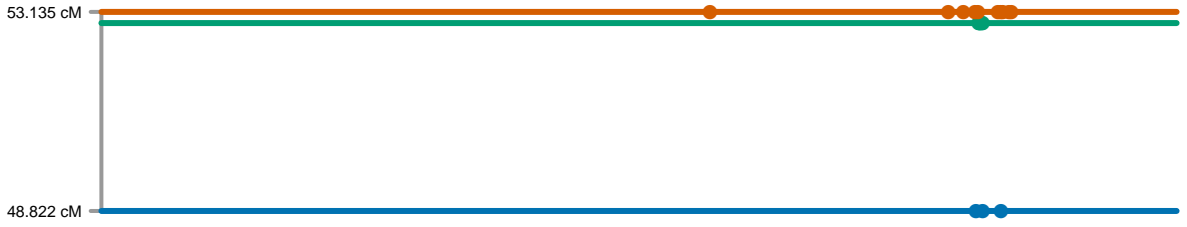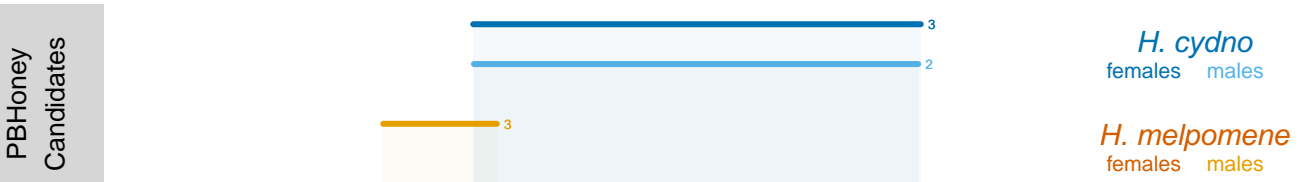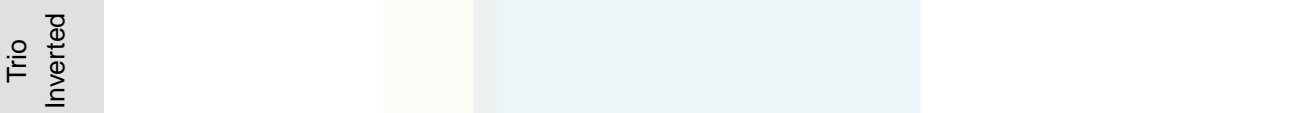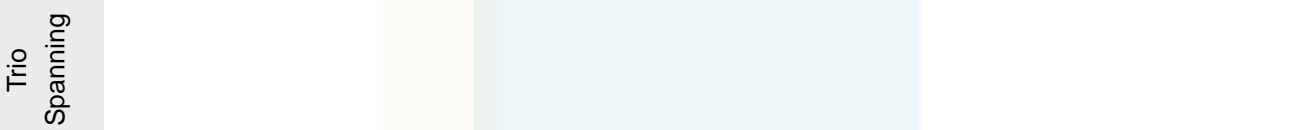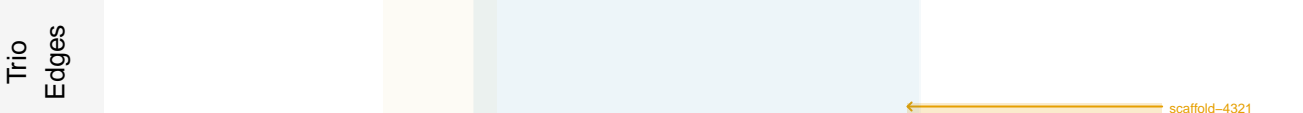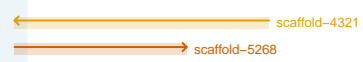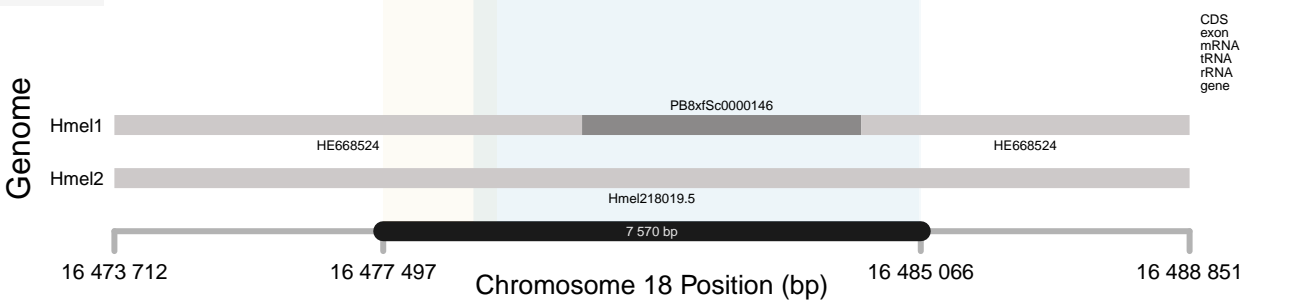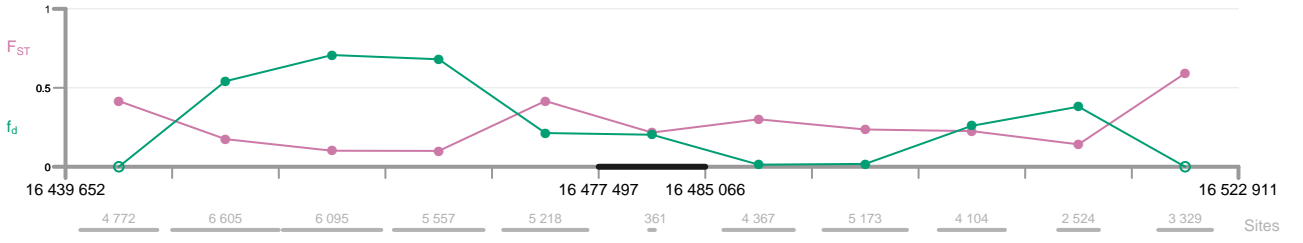

Figure S13.10

Both species

Split reads only

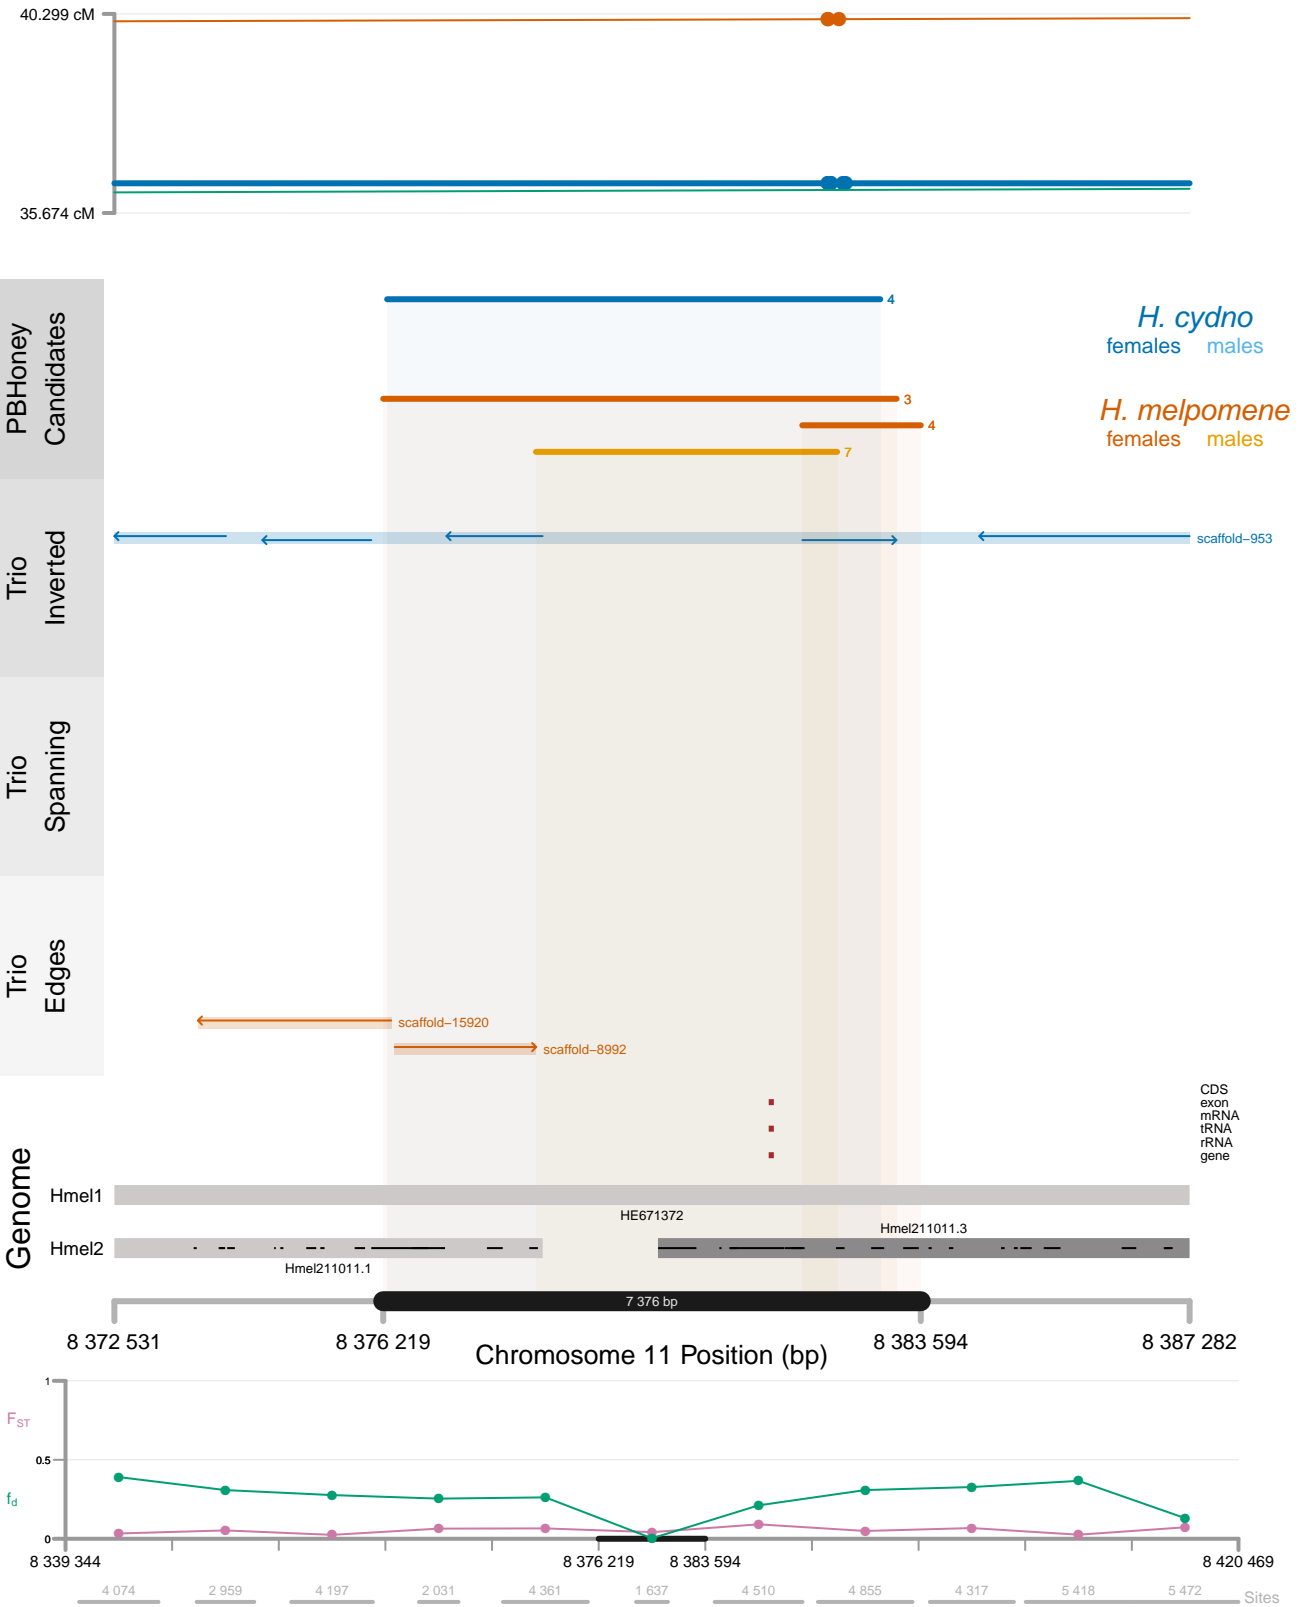

Figure S13.11

Both species

Split reads only

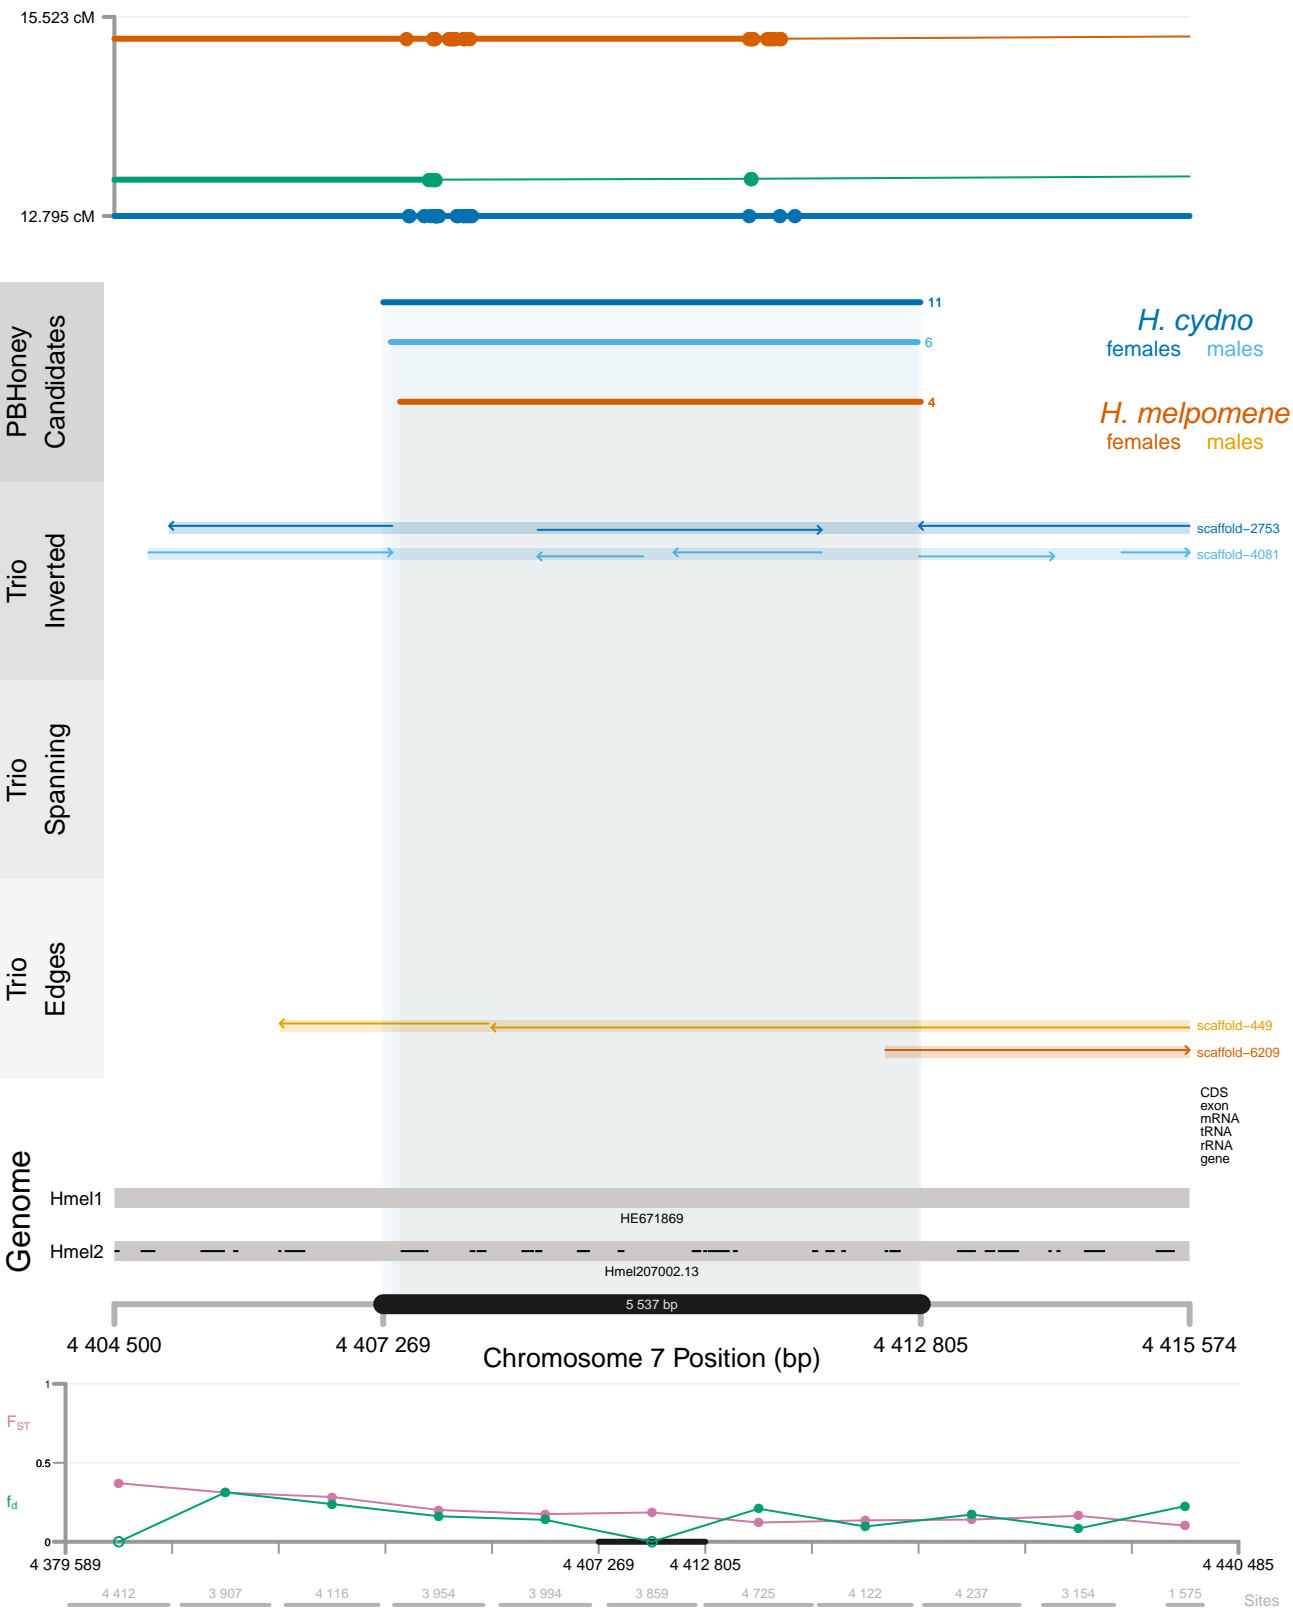

Figure S13.12

Both species

Split reads only

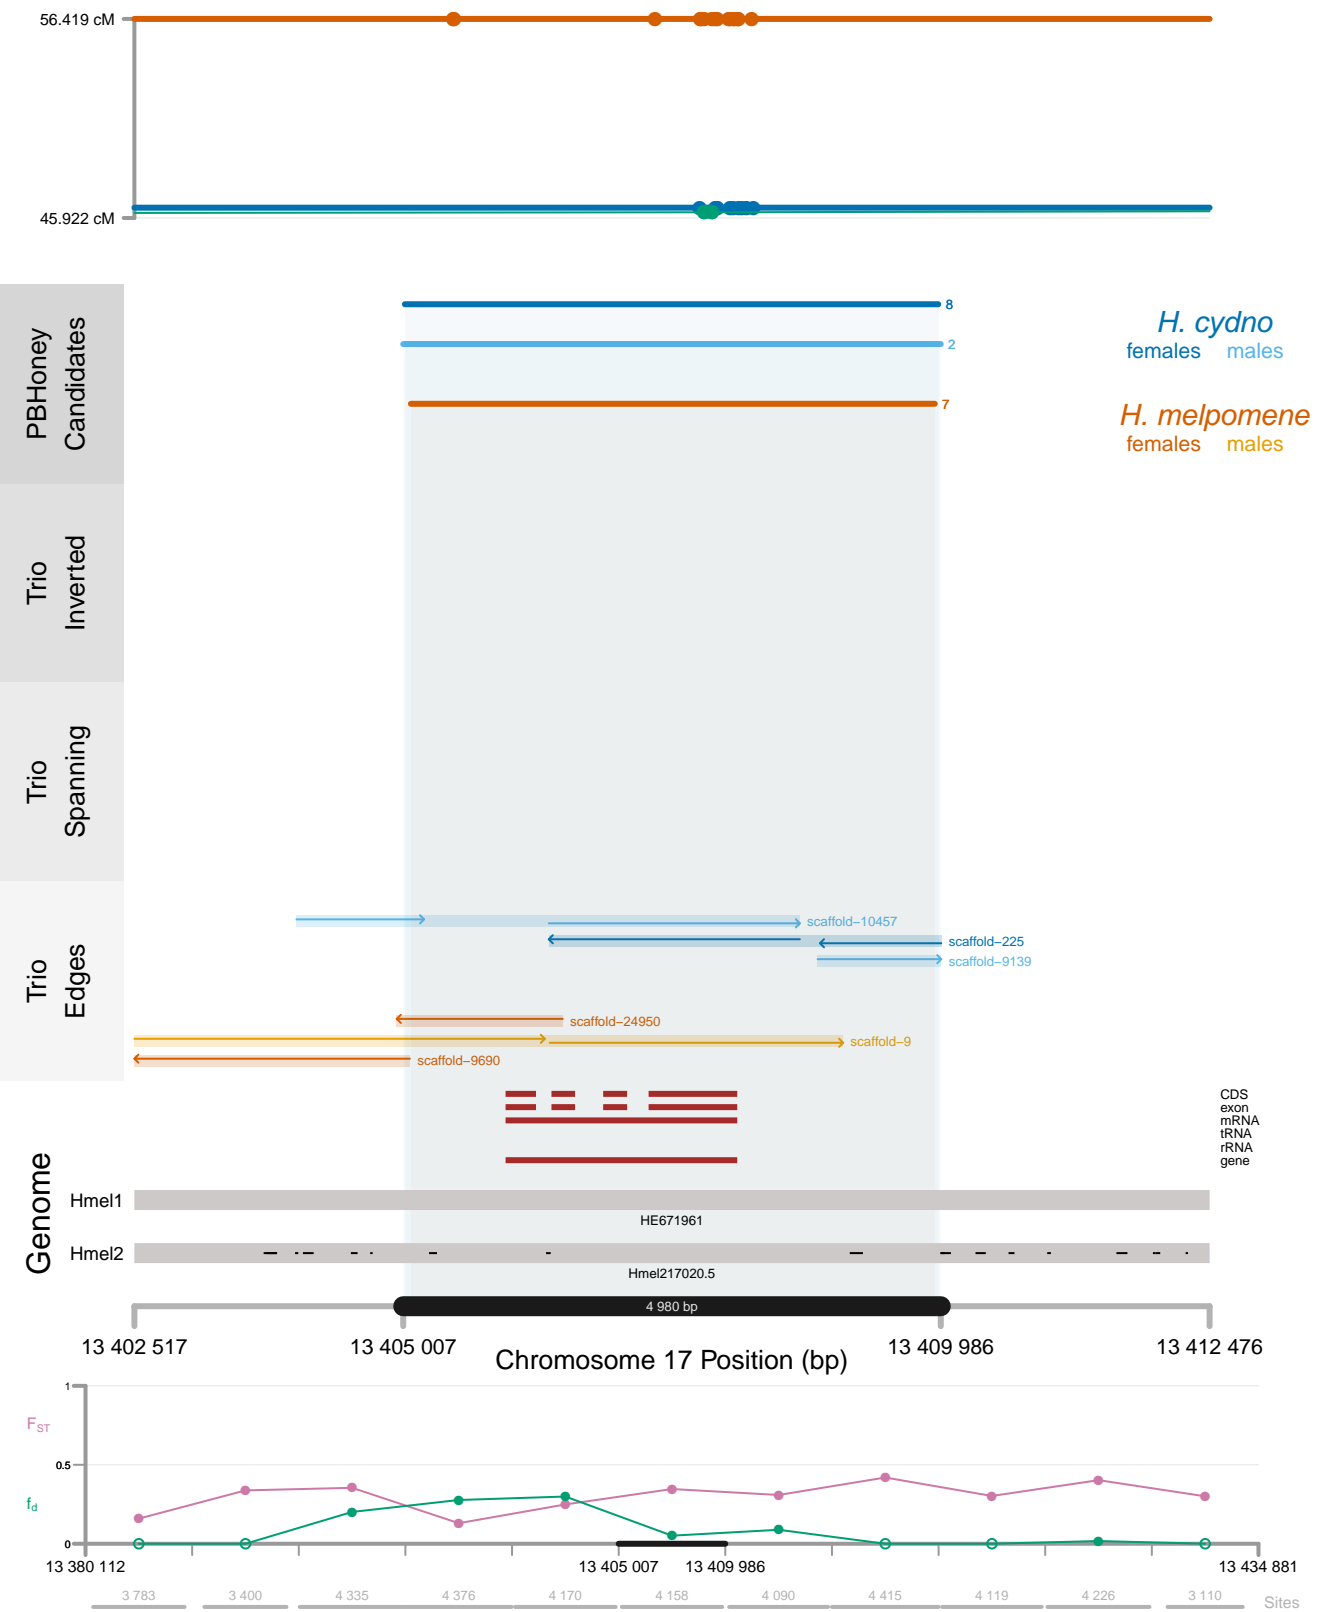

Figure S13.13

Both species

Split reads only

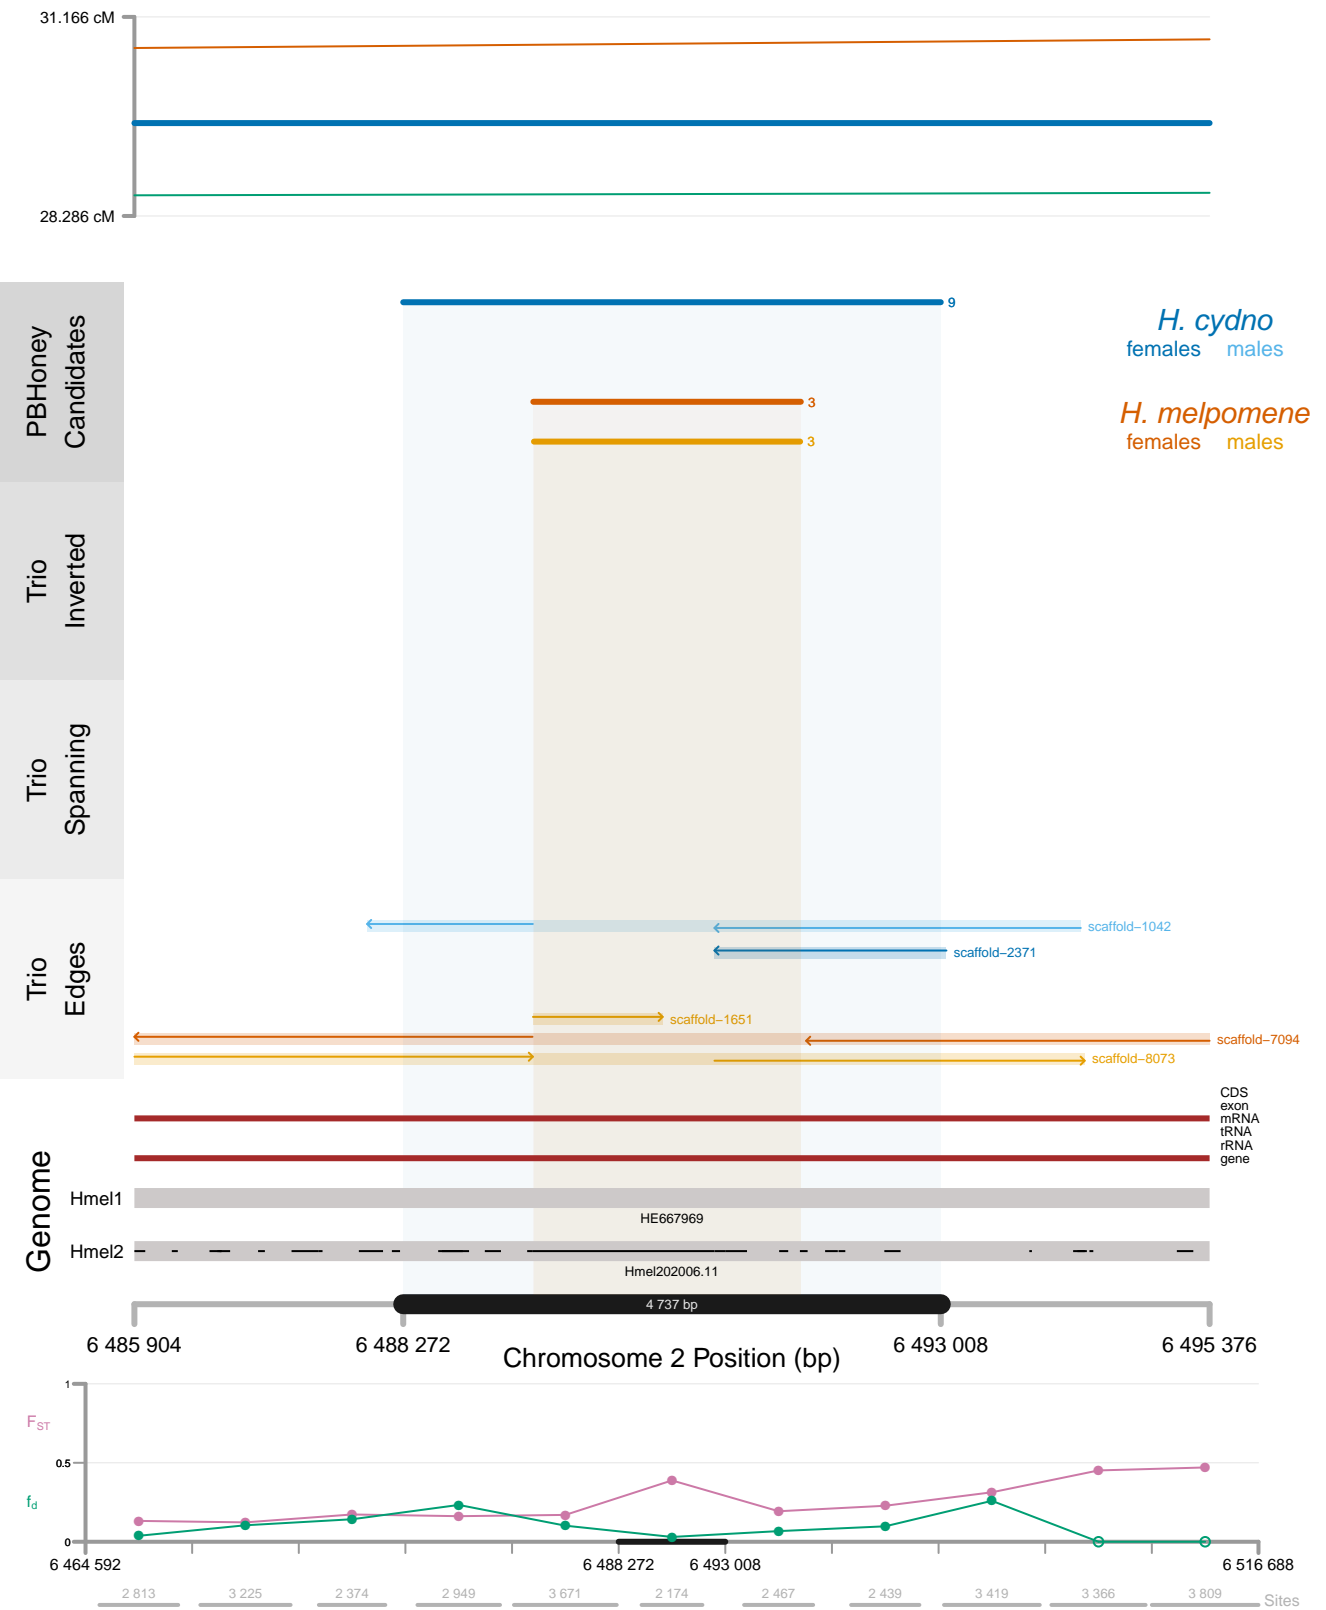

Figure S13.14

Both species

Split reads only

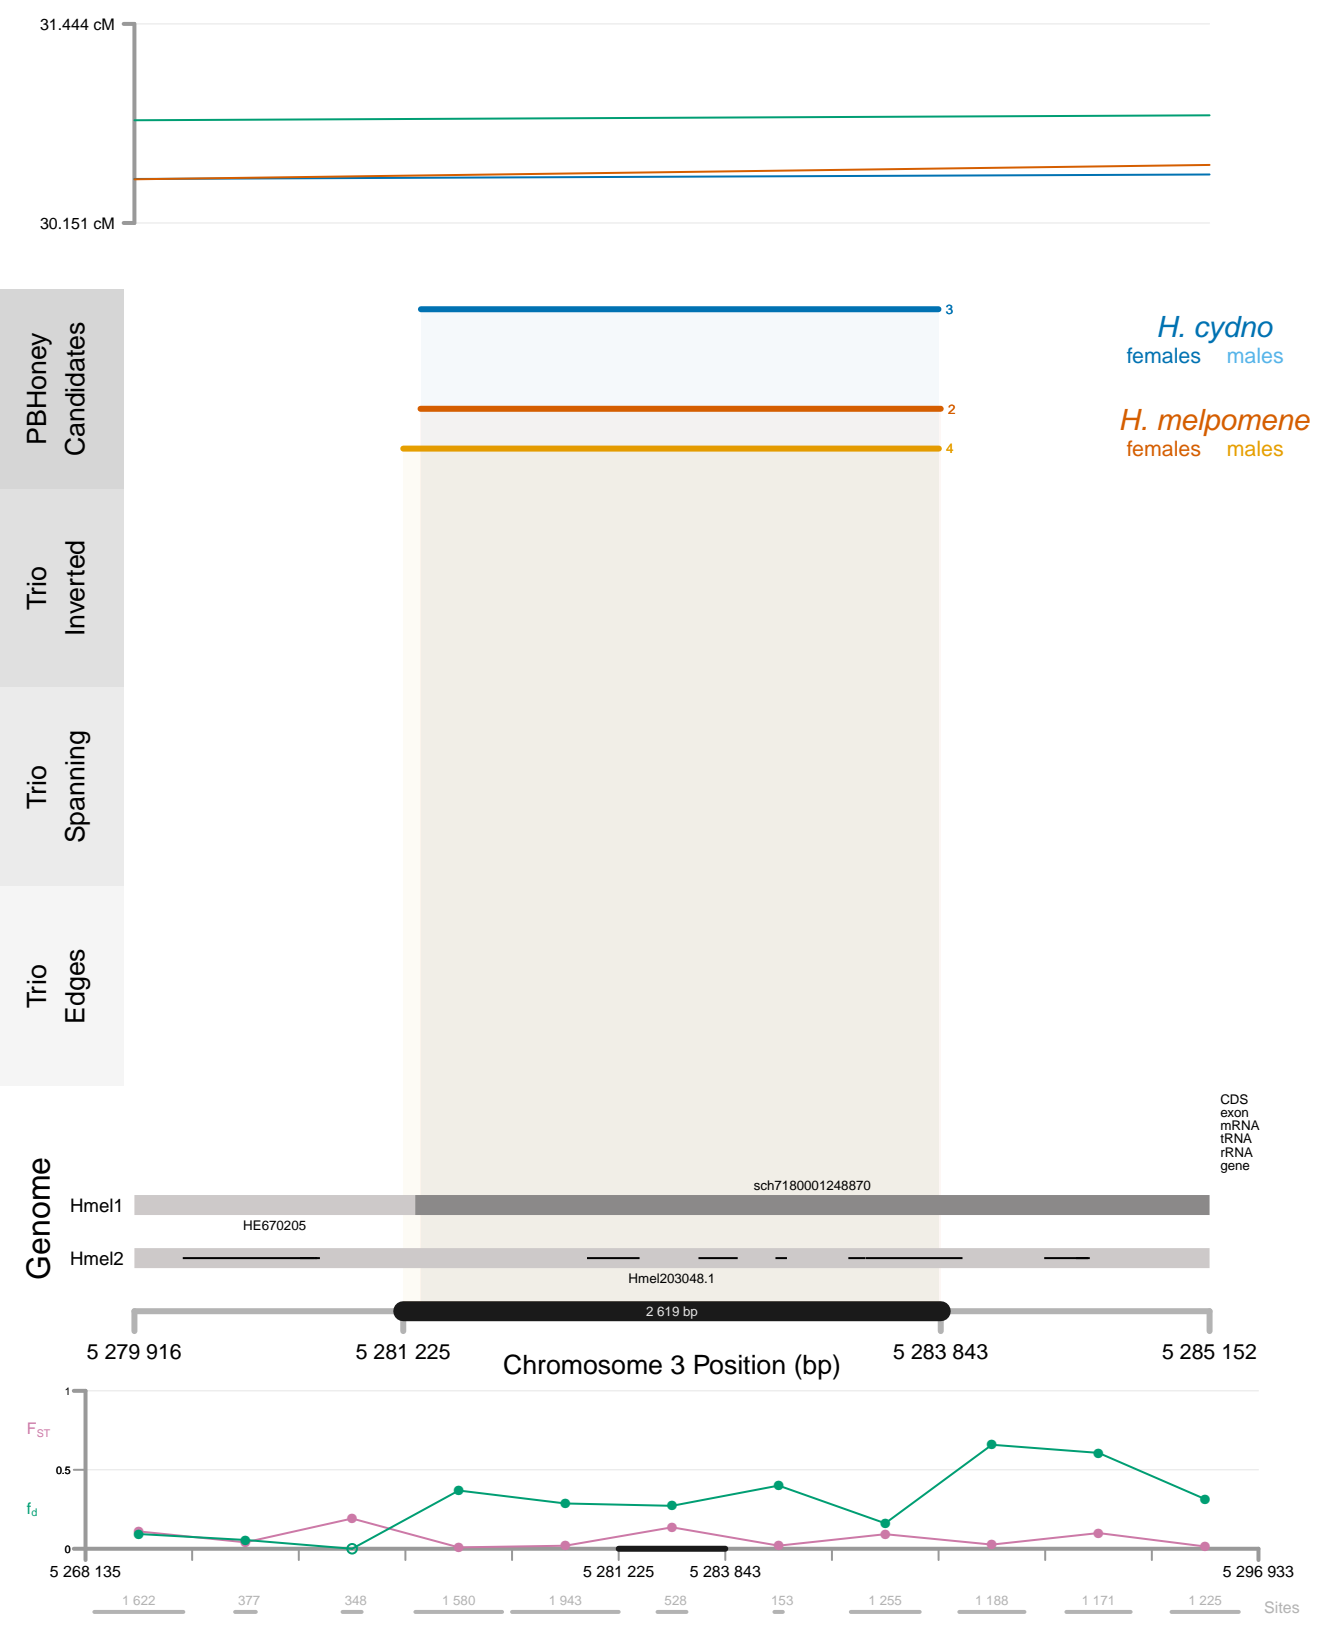

Figure S13.15

Both species

Split reads only

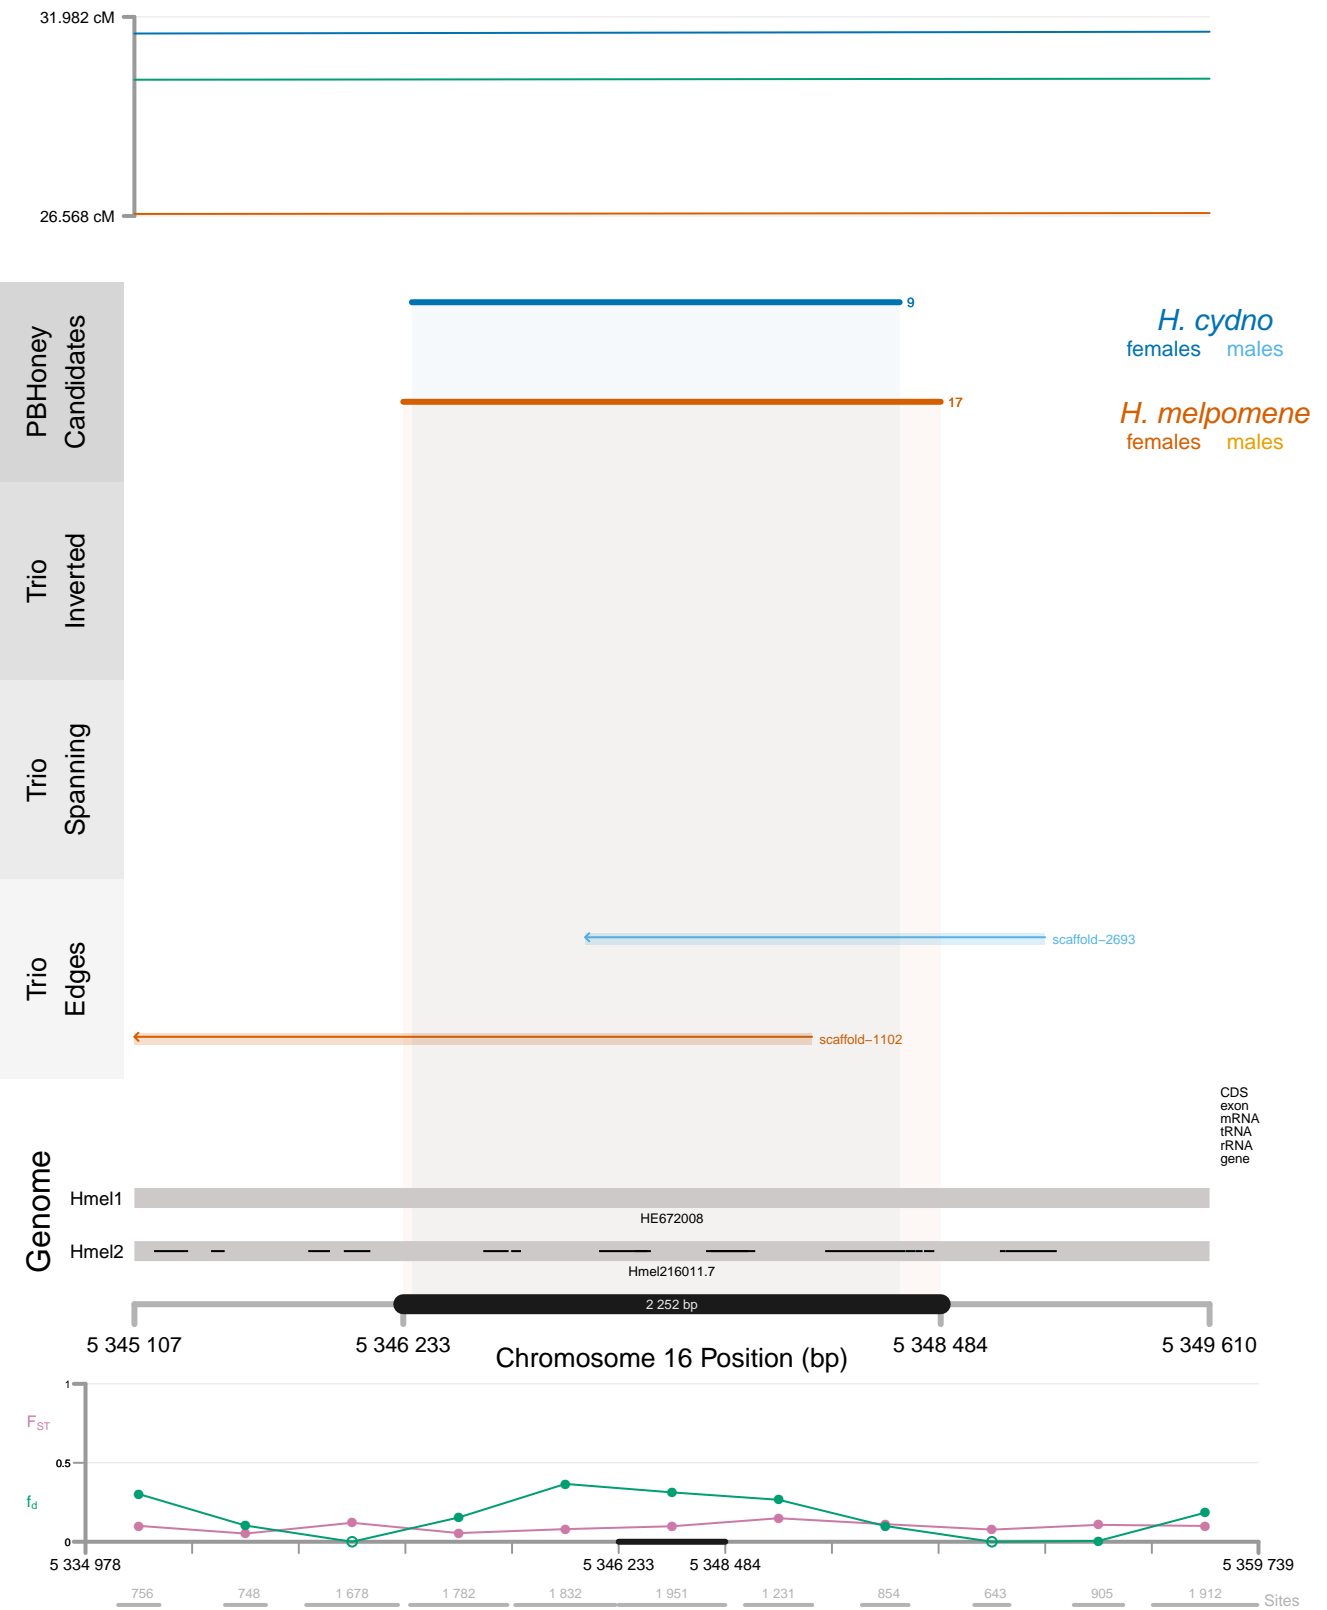

Figure S13.16

Both species

Split reads only

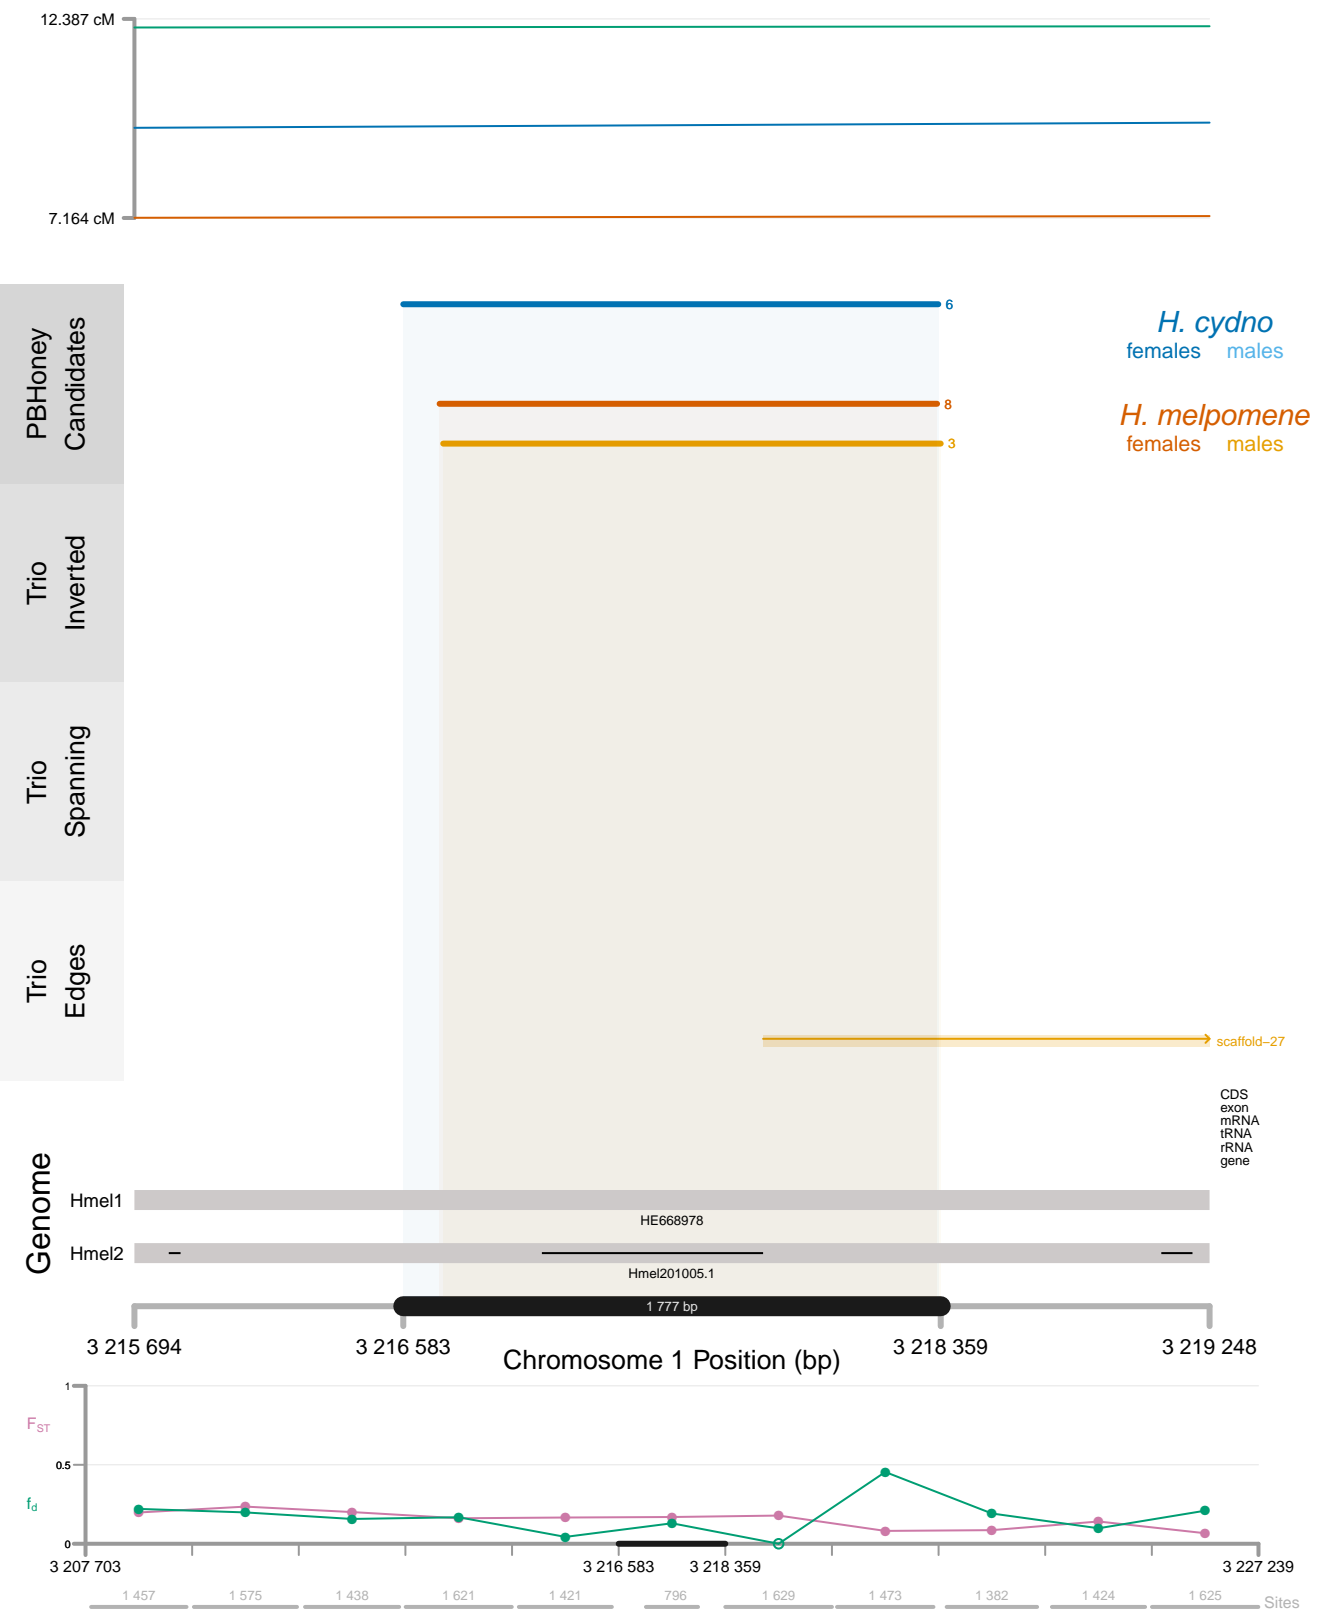



Figure S13.17

Both species

Split reads only

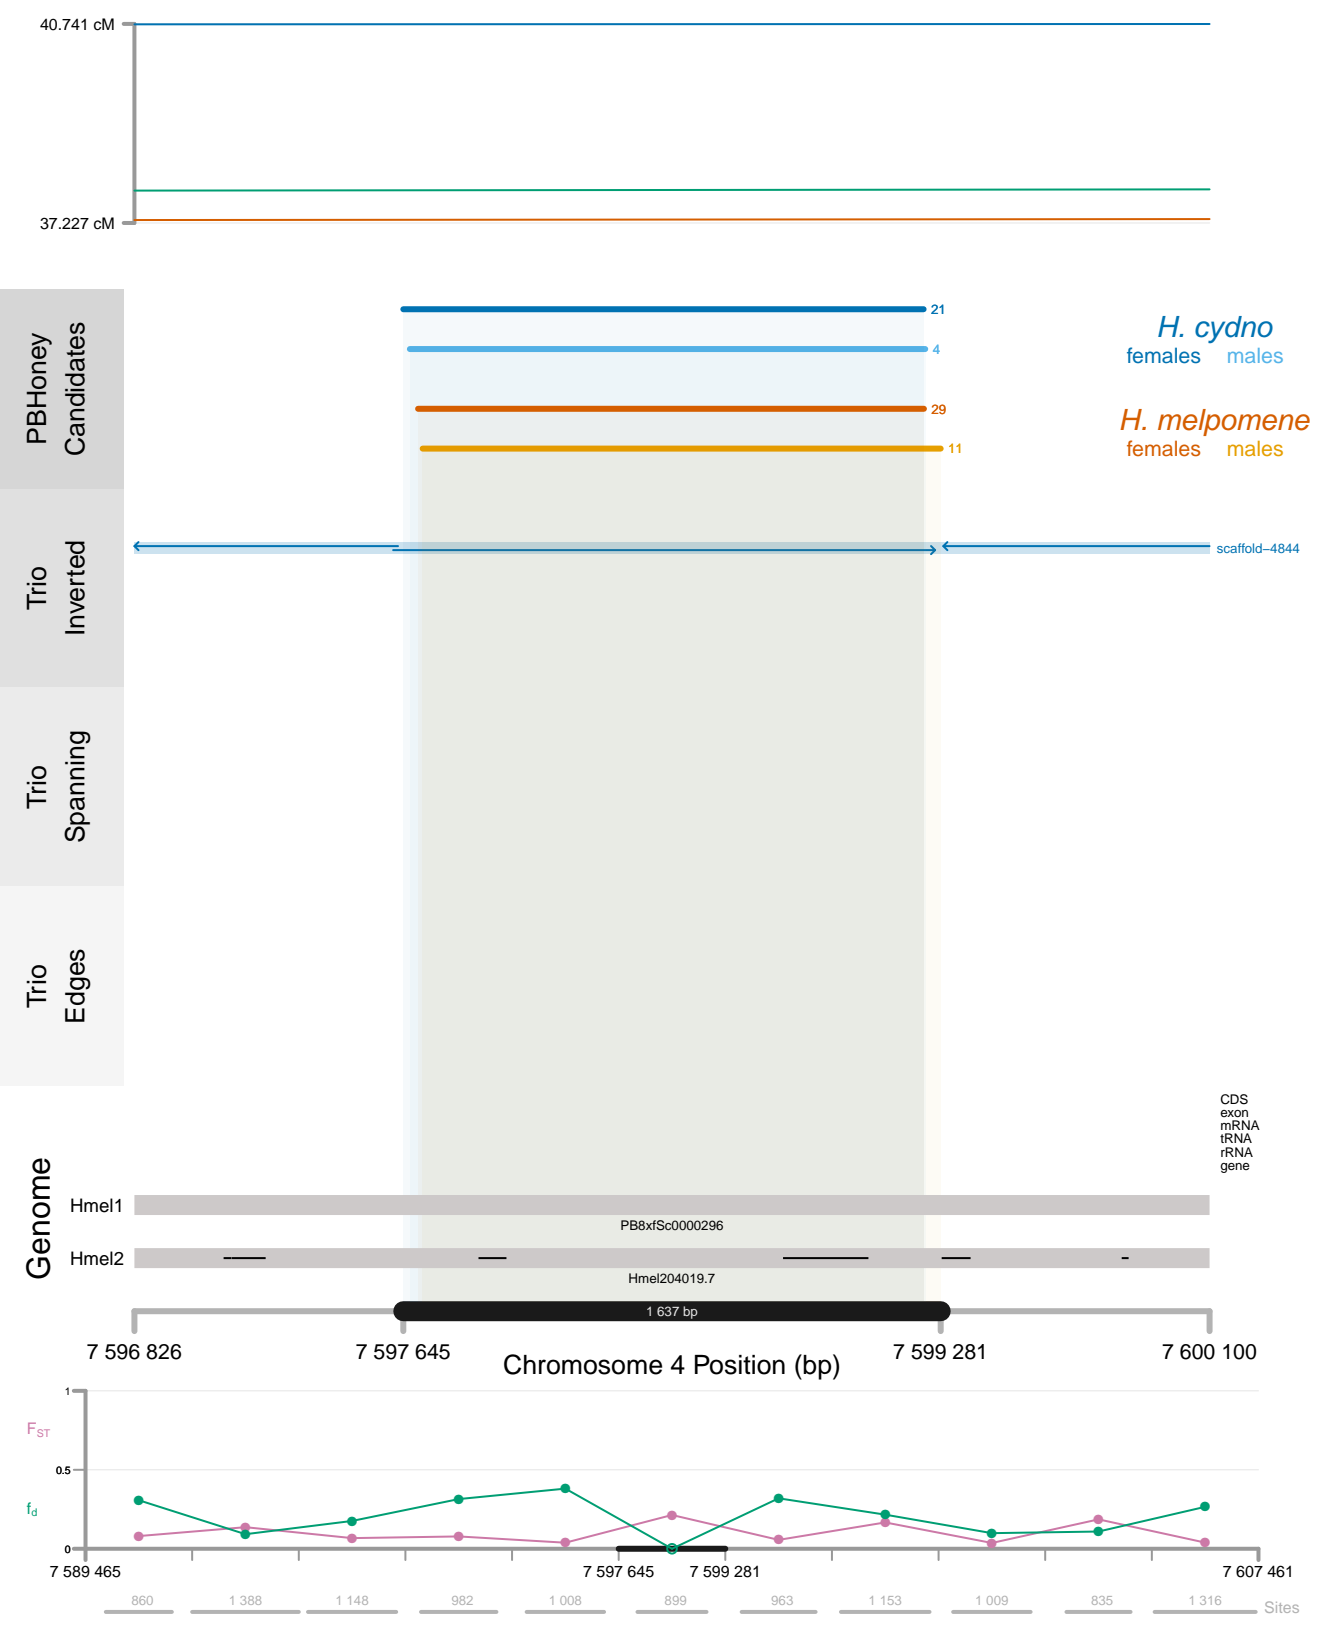

Supplement: Supplementary file [file 083931-13.pdf]
